# Supplementary material for: Spinal Cord Ventral Horns and Lymphoid Organ Involvement in Powassan Virus Infection in a Mouse Model
Source: MDPI journal article supplement (doi:10.3390/v8080220), 2016-08-12
Supplement: s1 [file s1]

# Supplementary Materials: Spinal Cord Ventral Horns and Lymphoid Organ Involvement in Powassan Virus Infection in a Mouse Model

Rodrigo I. Santos, Meghan E. Hermance, Benjamin B. Gelman, Saravanan Thangamani

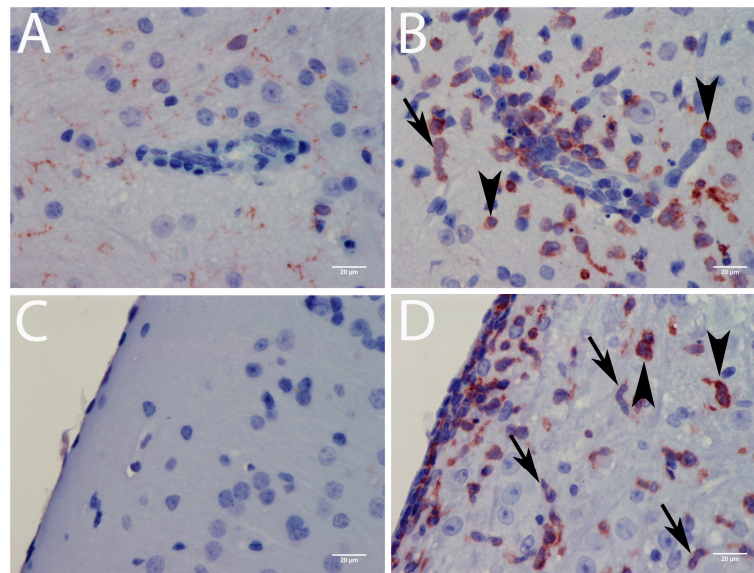

**Figure S1.** Immunohistochemistry for CD11b detection in the Brain. A) Control animal: vessel; B) POWV infected animal: perivascular infiltration; C) Control animal: meninges D) POWV-infected animal: meningitis. Scale bar correspond to 20μm (400X magnification). Arrows indicate microglial cells (rodcells), arrowheads indicate inflammatory macrophages.

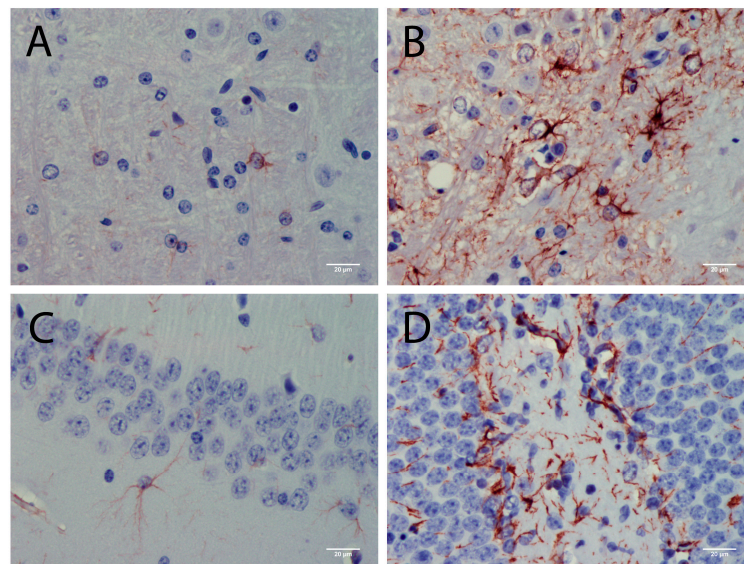

**Figure S2.** Immunohistochemistry for GFAP detection in brain sections. A) Control animal; normal GFAP staining for brainstem ; B) POWV infected animal: GFAP super-expression demonstrating astrogliosis in the brainstem; C) Control animal: normal GFAP staining for the hippocampus . D) POWV infected animal: GFAP super-expression demonstrating astrogliosis in the hippocampus. Scale bars correspond to 20μm (400X magnification).

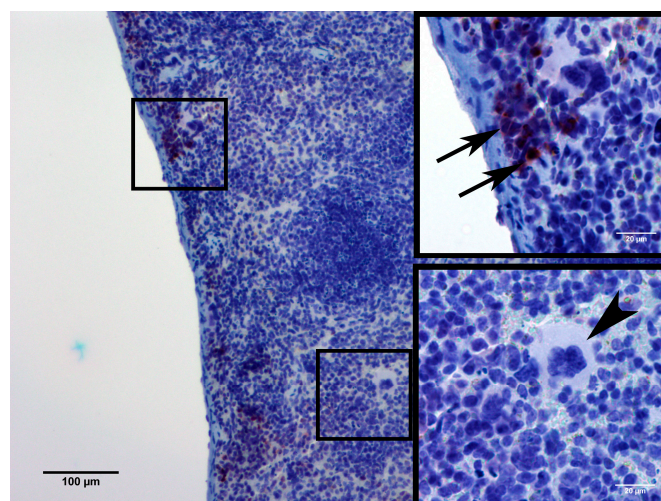

**Figure S3.** Immunohistochemistry for CD11b detection in infected spleen section. Arrows indicate CD11b-positive staining. Arrowhead indicates one giant cell; Note that giant cells are not stained for CD11b.

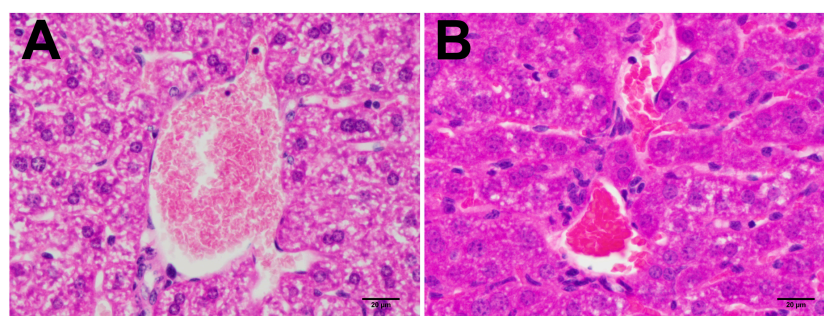

**Figure S4.** Histopathological findings in the liver (HE staining). A) Control animal; B) POWV-infected animal. Scale bars correspond to 20 µm (400X magnification).

**Table S1.** Summary of POWV pathological observations

|               |                 | Control          | Low dose infection |  |  |  |   |  |  |  |  |   | High dose infection |  |  |  |  |  |   |  |  |  |
|---------------|-----------------|------------------|--------------------|--|--|--|---|--|--|--|--|---|---------------------|--|--|--|--|--|---|--|--|--|
| POWV staining | Cerebellum      | Purkinje cells   |                    |  |  |  |   |  |  |  |  |   | *                   |  |  |  |  |  |   |  |  |  |
|               |                 | Granular         |                    |  |  |  | * |  |  |  |  |   |                     |  |  |  |  |  | * |  |  |  |
|               |                 | Molecular        |                    |  |  |  |   |  |  |  |  |   |                     |  |  |  |  |  |   |  |  |  |
|               | Brainstem       |                  |                    |  |  |  |   |  |  |  |  | * |                     |  |  |  |  |  |   |  |  |  |
|               | Hippocampus     | CA1-4            |                    |  |  |  |   |  |  |  |  |   |                     |  |  |  |  |  |   |  |  |  |
|               |                 | Dorsal Ganglia   |                    |  |  |  |   |  |  |  |  |   |                     |  |  |  |  |  | * |  |  |  |
|               | Thalamus        |                  |                    |  |  |  |   |  |  |  |  | * |                     |  |  |  |  |  |   |  |  |  |
|               | Midbrain        |                  |                    |  |  |  |   |  |  |  |  |   |                     |  |  |  |  |  |   |  |  |  |
|               | Neocortex       | Caudal           |                    |  |  |  |   |  |  |  |  |   | *                   |  |  |  |  |  |   |  |  |  |
|               |                 | Medial           |                    |  |  |  |   |  |  |  |  |   |                     |  |  |  |  |  |   |  |  |  |
|               |                 | Frontal/piriform |                    |  |  |  |   |  |  |  |  |   |                     |  |  |  |  |  |   |  |  |  |
|               | Basal Ganglia   |                  |                    |  |  |  |   |  |  |  |  |   |                     |  |  |  |  |  |   |  |  |  |
|               | Corpus callosum |                  |                    |  |  |  | * |  |  |  |  |   |                     |  |  |  |  |  |   |  |  |  |
| Inflammation  | Cerebellum      | Purkinje cells   |                    |  |  |  |   |  |  |  |  |   |                     |  |  |  |  |  |   |  |  |  |
|               |                 | Granular         |                    |  |  |  |   |  |  |  |  |   |                     |  |  |  |  |  |   |  |  |  |
|               |                 | Molecular        |                    |  |  |  |   |  |  |  |  |   |                     |  |  |  |  |  |   |  |  |  |
|               | Brainstem       |                  |                    |  |  |  |   |  |  |  |  |   |                     |  |  |  |  |  |   |  |  |  |
|               | Hippocampus     | CA1-4            |                    |  |  |  |   |  |  |  |  |   |                     |  |  |  |  |  |   |  |  |  |
|               |                 | Dorsal Ganglia   |                    |  |  |  |   |  |  |  |  |   |                     |  |  |  |  |  |   |  |  |  |
|               | Thalamus        |                  |                    |  |  |  |   |  |  |  |  |   |                     |  |  |  |  |  |   |  |  |  |
|               | Midbrain        |                  |                    |  |  |  |   |  |  |  |  |   |                     |  |  |  |  |  |   |  |  |  |
|               | Neocortex       | Caudal           |                    |  |  |  |   |  |  |  |  |   |                     |  |  |  |  |  |   |  |  |  |
|               |                 | Medial           |                    |  |  |  |   |  |  |  |  |   |                     |  |  |  |  |  |   |  |  |  |
|               |                 | Frontal/piriform |                    |  |  |  |   |  |  |  |  |   |                     |  |  |  |  |  |   |  |  |  |
|               | Basal Ganglia   |                  |                    |  |  |  |   |  |  |  |  |   |                     |  |  |  |  |  |   |  |  |  |
|               | Corpus callosum |                  |                    |  |  |  |   |  |  |  |  |   |                     |  |  |  |  |  |   |  |  |  |

Results are shown as POWV staining (upper panel) or inflammation (below panel) ranking between the groups: “white” no positive cells/no inflammation, \* 1 to 5 positive cell in an area. The colors in each spot mean the grade of POWV-positive cells/inflammation for each brain area, where the yellow represents low level inflammation/POWV staining and the black represents wide spread inflammation/POWV staining. The color grade ranking from low to high are:    

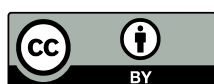

© 2016 by the authors, licensee MDPI, Basel, Switzerland. This article is an open access article distributed under the terms and conditions of the Creative Commons Attribution (CC-BY) license (<http://creativecommons.org/licenses/by/4.0/>).
